# Supplementary material for: ‘Click’ functionalised polymer resins: a new approach to the synthesis of surface attached bipyridinium and naphthalene diimide [2]rotaxanes
Source: Royal Society of Chemistry journal article supplement (doi:10.1039/c3ob27273g), 2013-01-01
Supplement: c3ob27273g.pdf [file c3ob27273g.pdf]

## Supporting Information

# **‘Click’ functionalised polymer resins: a new approach to the synthesis of surface attached bipyridinium and naphthalenediimide [2]rotaxanes**

Hannah Wilson, Sean Byrne, Nick Bampos, Kathleen M. Mullen

School of Chemistry, Physics and Mechanical Engineering, Queensland University of Technology, Brisbane, Queensland 4001, Australia.

### **Contents**

|                                                                                                |    |
|------------------------------------------------------------------------------------------------|----|
| 1. UV-Vis Spectroscopy Studies of Rotaxanes.....                                               | S2 |
| 2. <sup>1</sup> H NMR Assignment of Diimide Rotaxane <b>12</b> .....                           | S2 |
| 3. IR Spectroscopy Studies .....                                                               | S3 |
| 4. HR MAS <sup>1</sup> H NMR Assignment of Diimide Thread Functionalised Beads <b>16</b> ..... | S5 |
| 5. <sup>1</sup> H and <sup>13</sup> C NMR Spectra of All Key Compounds .....                   | S5 |

## UV-Vis Spectroscopy Studies of Rotaxanes

### UV-Vis Absorption Spectra

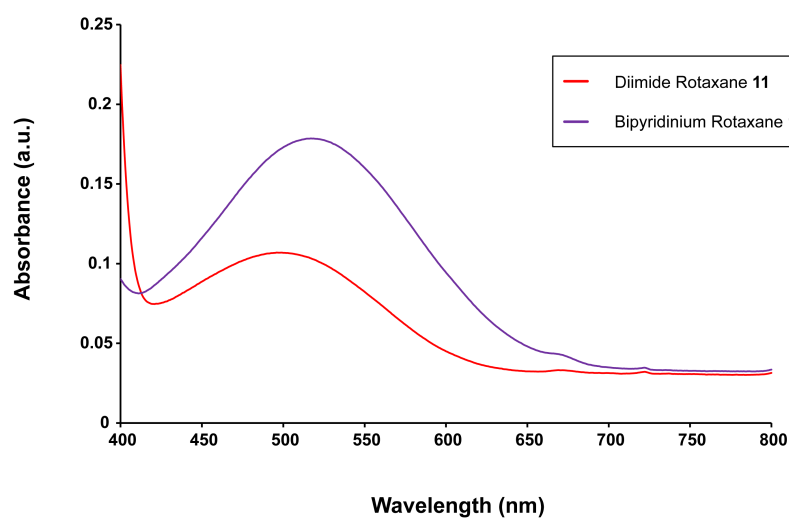

**Figure S1:** Absorption spectra of the bipyridinium rotaxane **11** and the diimide rotaxane **12** in  $\text{CHCl}_3$  (concentration =  $0.10 \text{ mM}^{-1}$ ).

### $^1\text{H}$ NMR Assignment of Diimide Rotaxane **12**

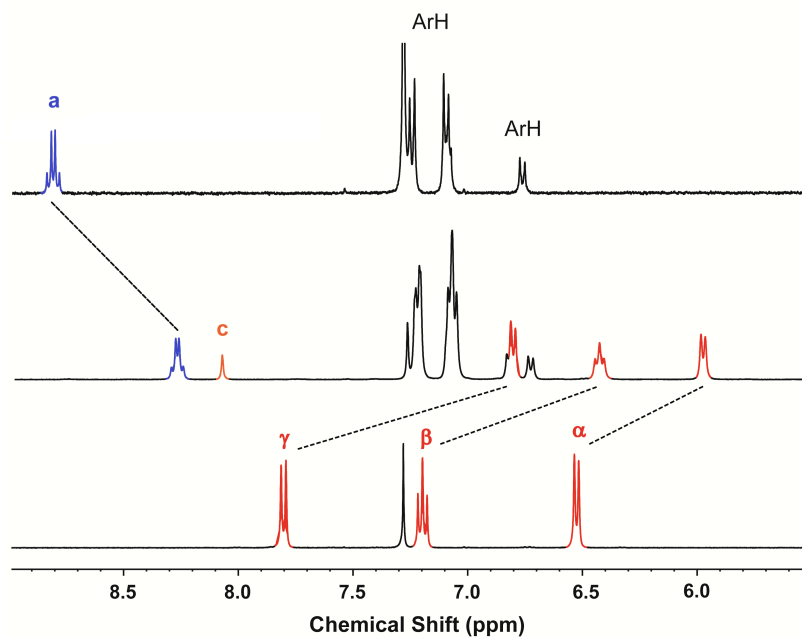

**Figure S2:** 400 MHz  $^1\text{H}$  NMR of mono stoppered diimide thread **9** (top), diimide rotaxane **12** (middle) and dinaphth-38-crown-10 **10** (bottom) in  $\text{CDCl}_3$  at 303 K.

## IR Spectroscopy Studies

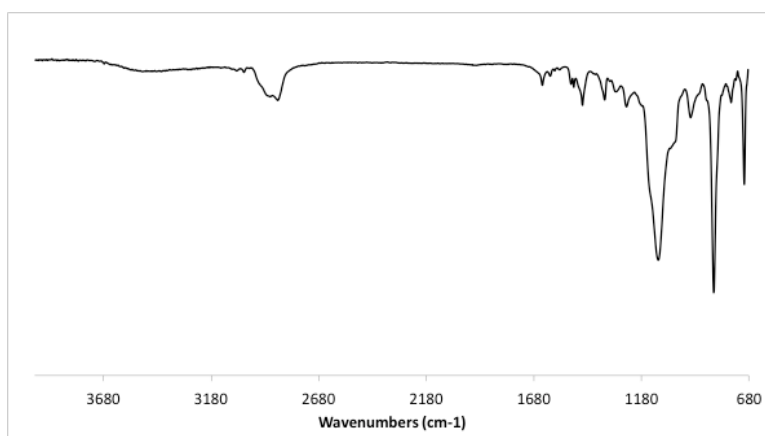

**Figure S3:** Full IR spectrum for bipyridinium thread functionalised beads **15**.

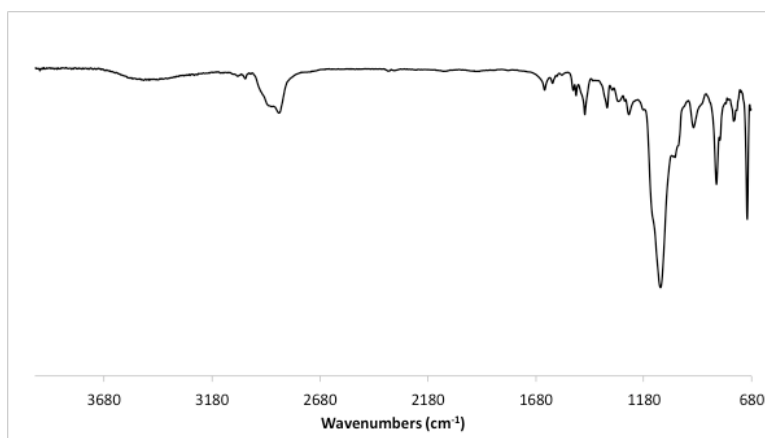

**Figure S4:** Full IR spectrum for bipyridinium rotaxane functionalised beads **1** using 1 equivalent of crown macrocycle **10** during synthesis.

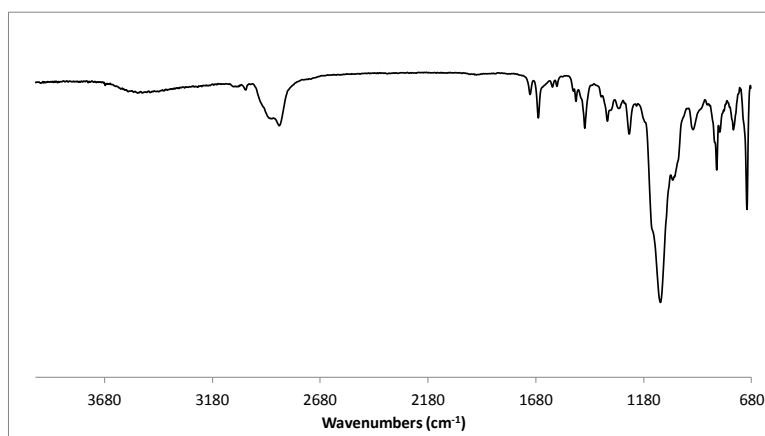

**Figure S5:** Full IR spectrum for diimide rotaxane functionalised beads **2** using 1 equivalent of crown macrocycle **10** during synthesis.

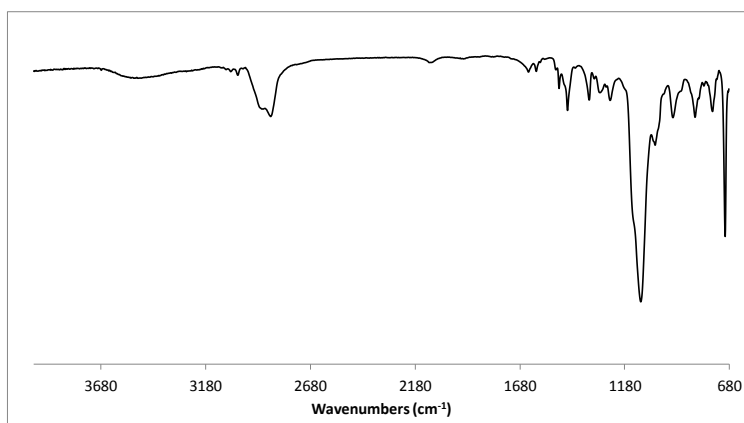

**Figure S6:** Full IR spectrum for bipyridinium rotaxane functionalised beads **1** using 5 equivalent of crown macrocycle **10** during synthesis.

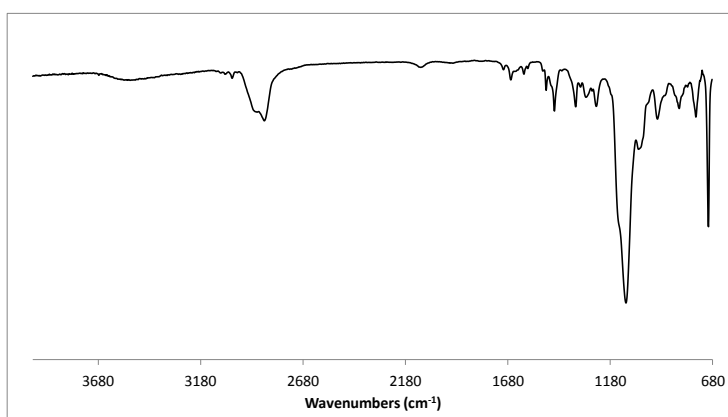

**Figure S7:** Full IR spectrum for diimide rotaxane functionalised beads **2** using 5 equivalent of crown macrocycle **10** during synthesis.

## HR MAS $^1\text{H}$ NMR Assignment of Diimide Thread Functionalised Beads **16**

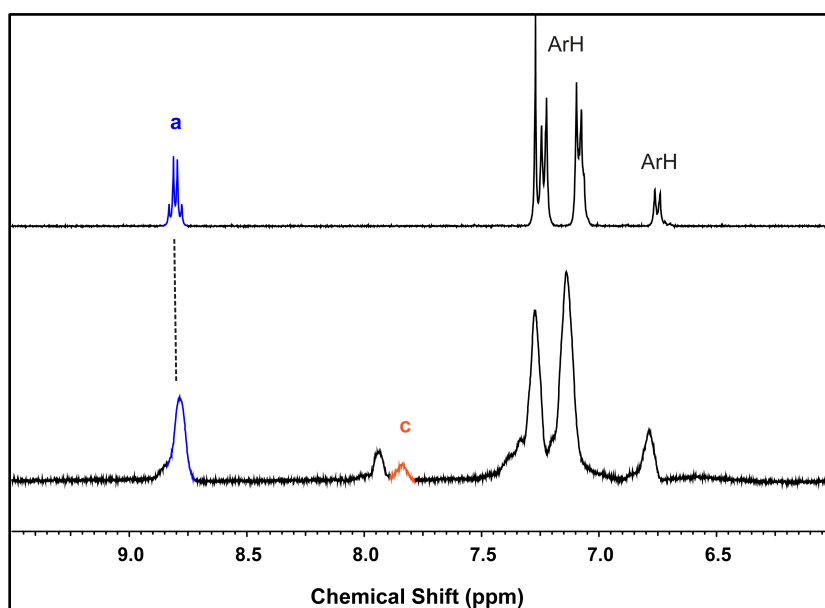

**Figure S8:** 400 MHz  $^1\text{H}$  NMR spectrum of the mono stoppered diimide thread **9** (top) and HR MAS  $^1\text{H}$  NMR spectrum of the diimide thread functionalised beads **16** (8 CPMG, bottom) in  $\text{CDCl}_3$ .

## $^1\text{H}$ and $^{13}\text{C}$ NMR Spectra of All Key Compounds

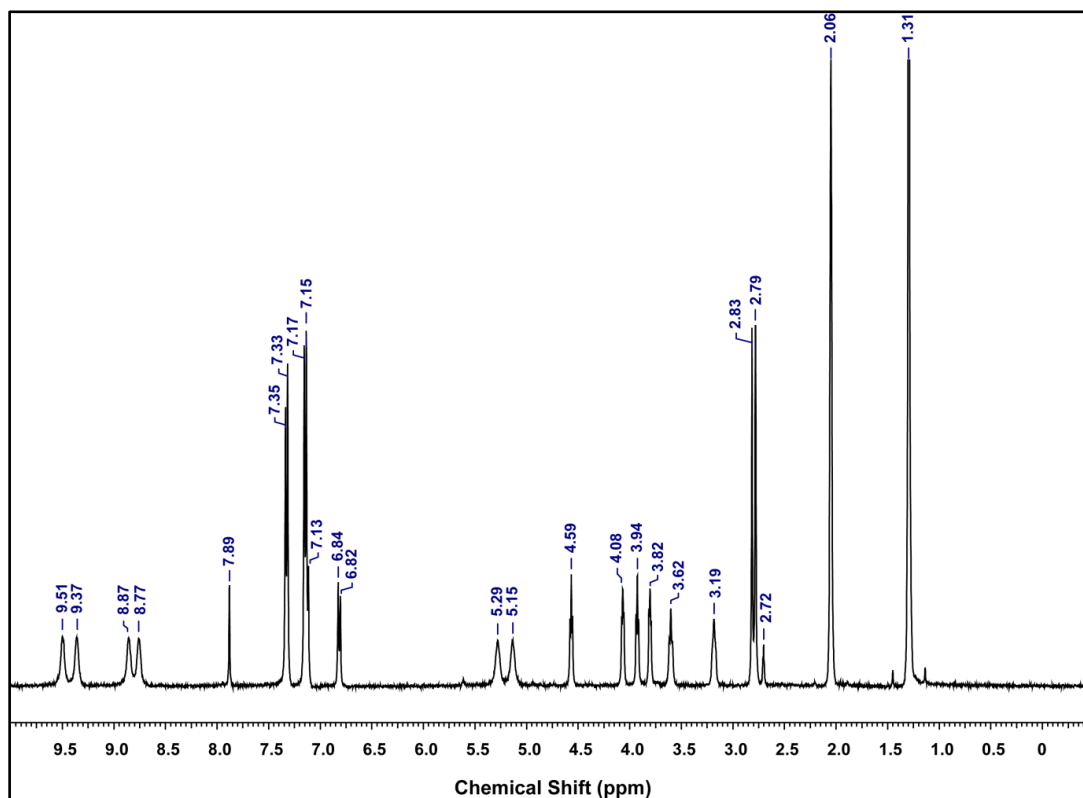

**Figure 9.** 400 MHz  $^1\text{H}$  NMR spectrum of mono-stoppered BIPY.2PF<sub>6</sub> thread **5**

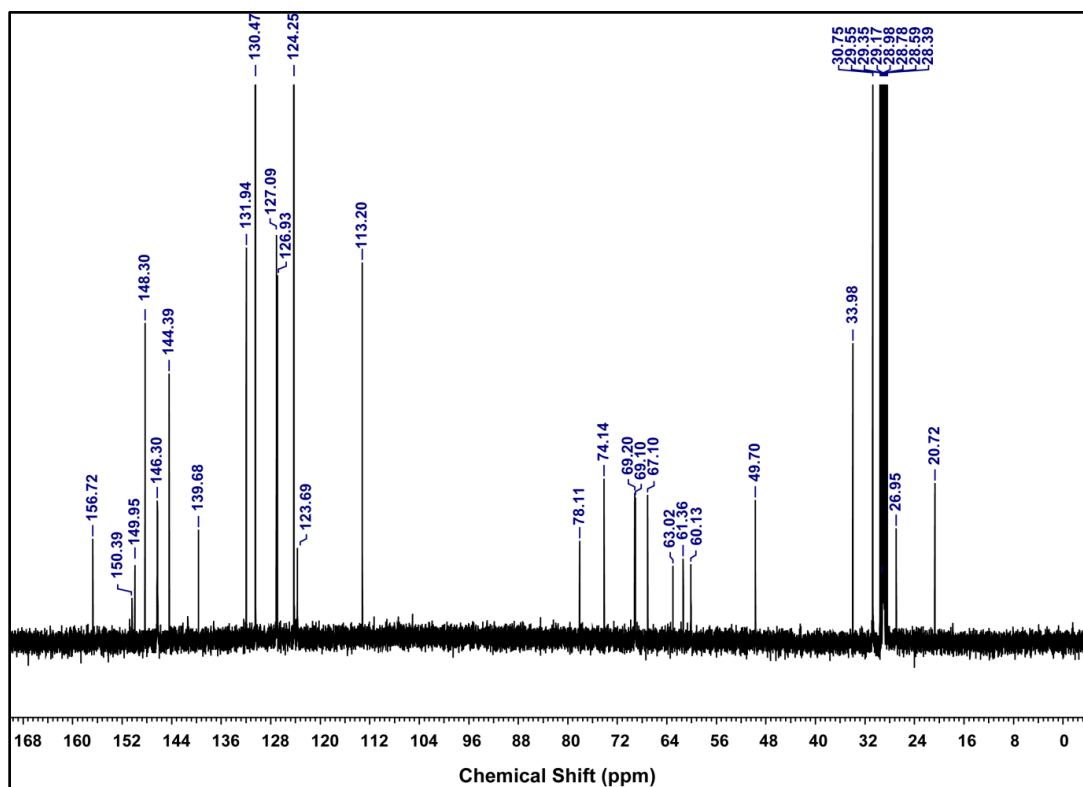

Figure S10. 100 MHz  $^{13}\text{C}$  NMR spectrum of mono-stoppered BIPY. $2\text{PF}_6$  thread 5

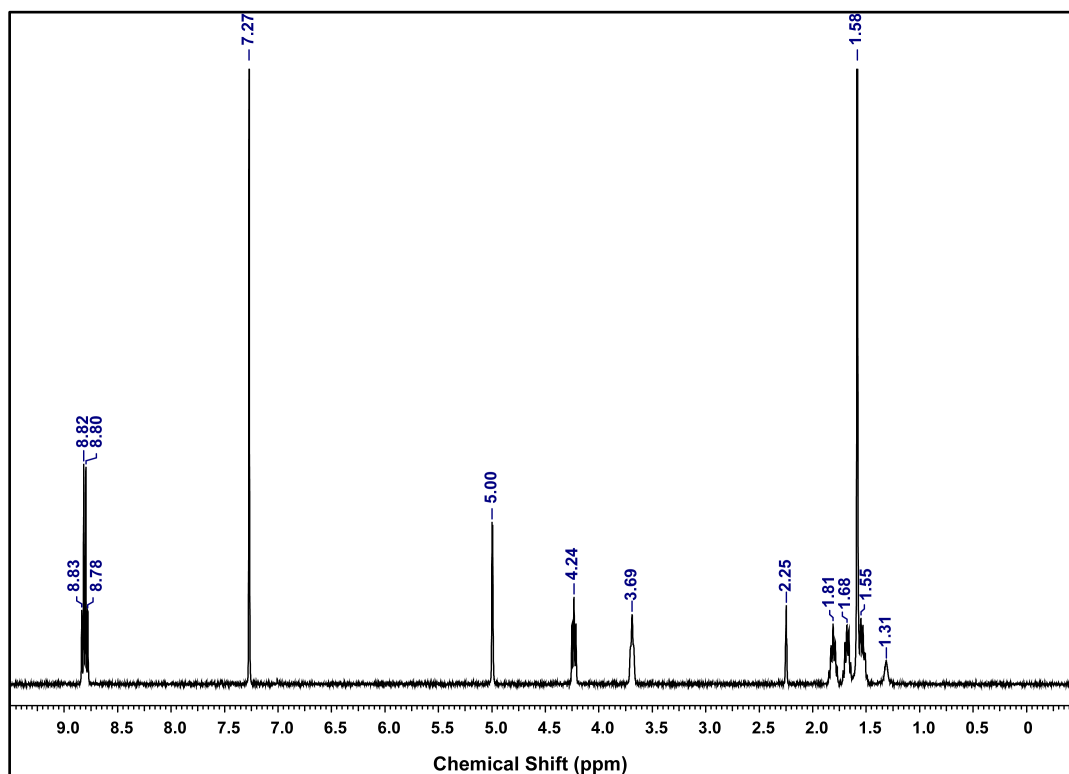

Figure S11. 400 MHz  $^1\text{H}$  NMR spectrum of unsymmetrical NDI thread 8

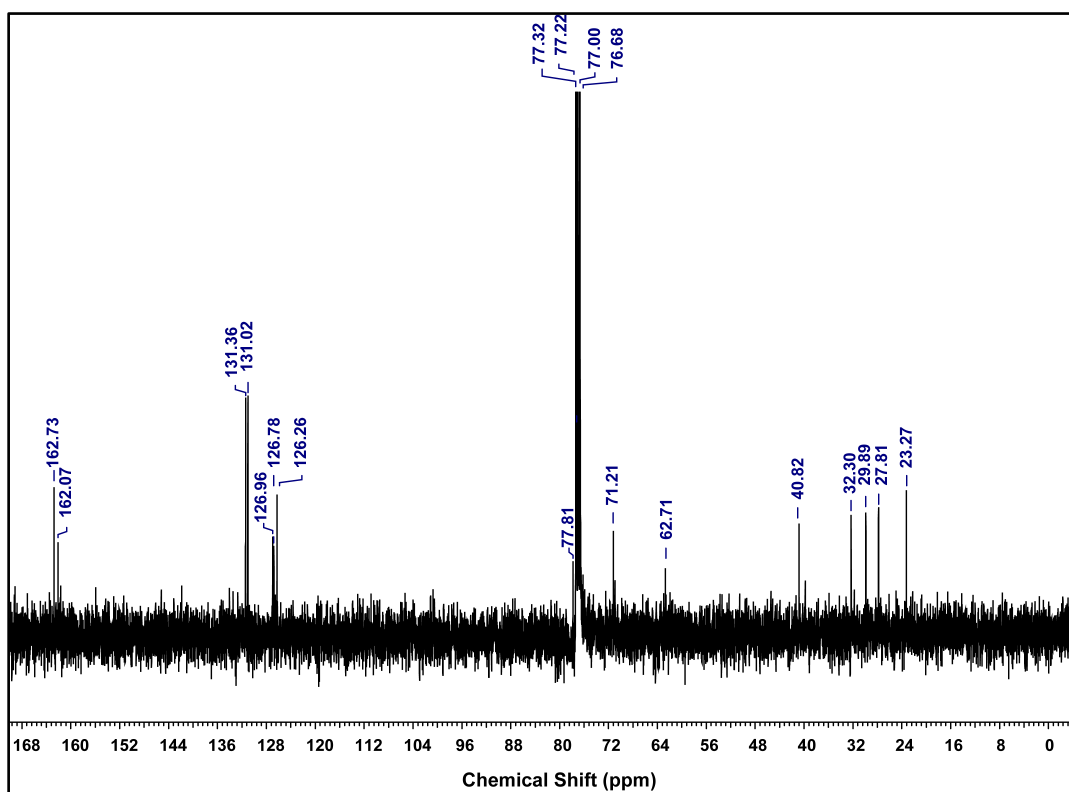

Figure S12. 100 MHz  $^{13}\text{C}$  NMR spectrum of spectrum of unsymmetrical NDI thread **8**

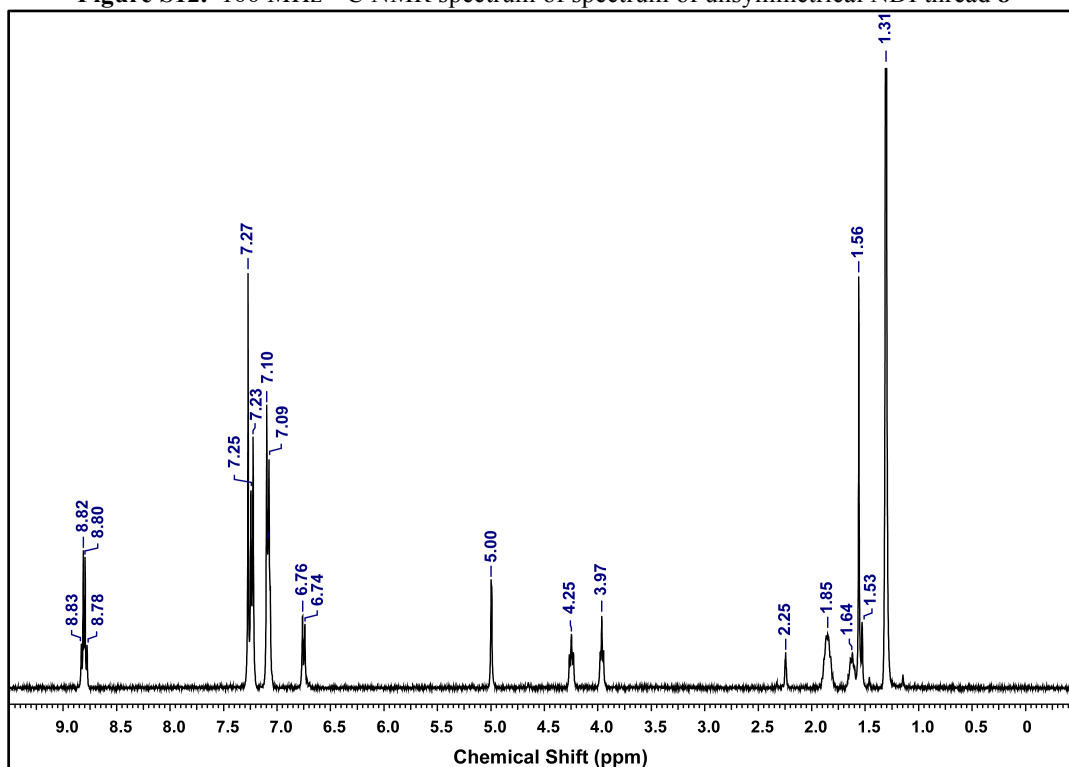

Figure S13. 400 MHz  $^1\text{H}$  NMR spectrum of mono-stoppered NDI thread **9**

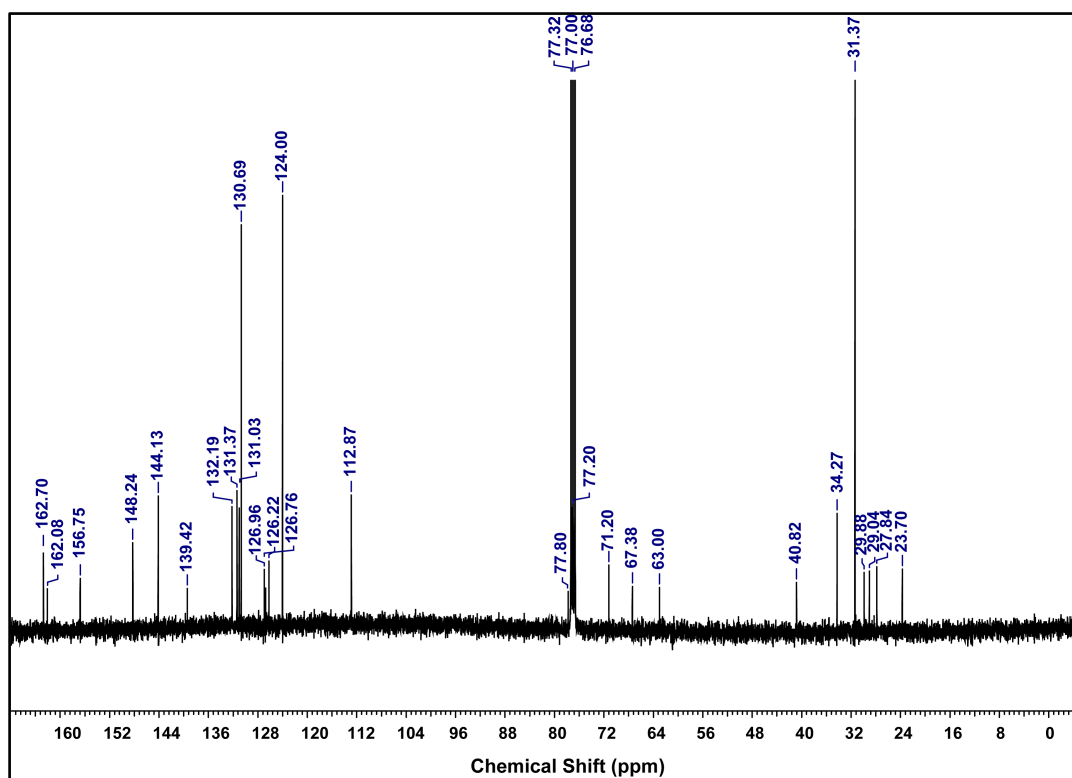

Figure S14. 100 MHz  $^{13}\text{C}$  NMR spectrum of mono-stoppered NDI thread **9**

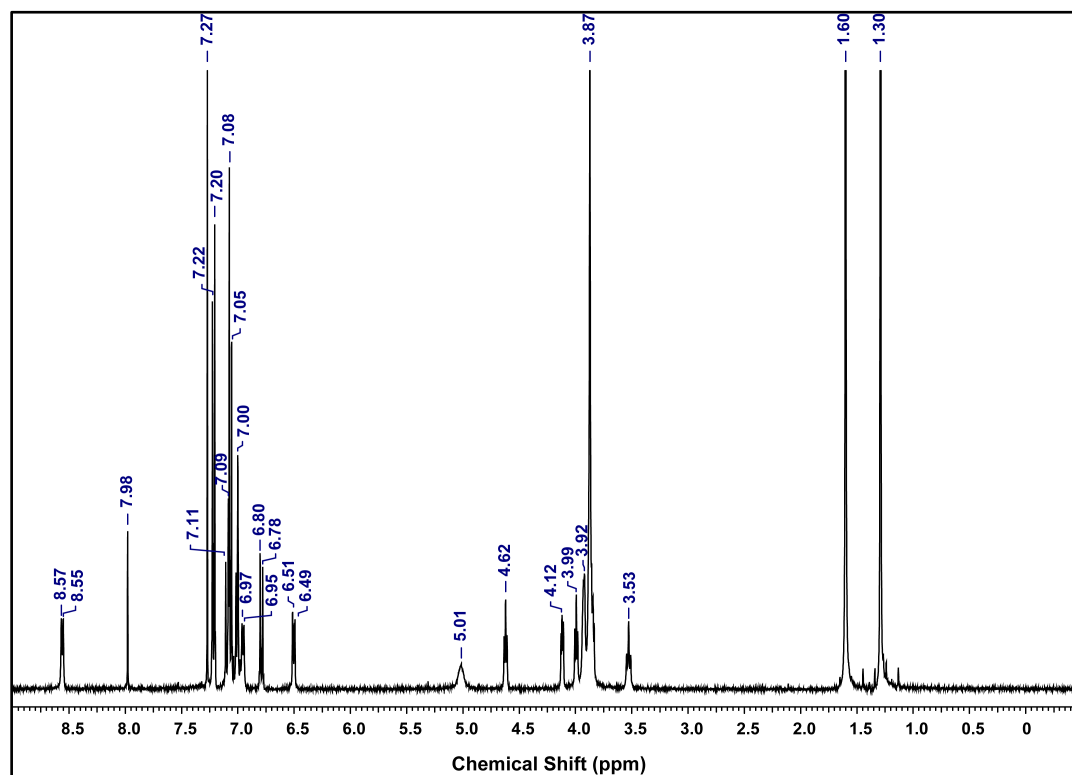

Figure S15. 400 MHz  $^1\text{H}$  NMR spectrum of BIPY.2PF<sub>6</sub> rotaxane **11**



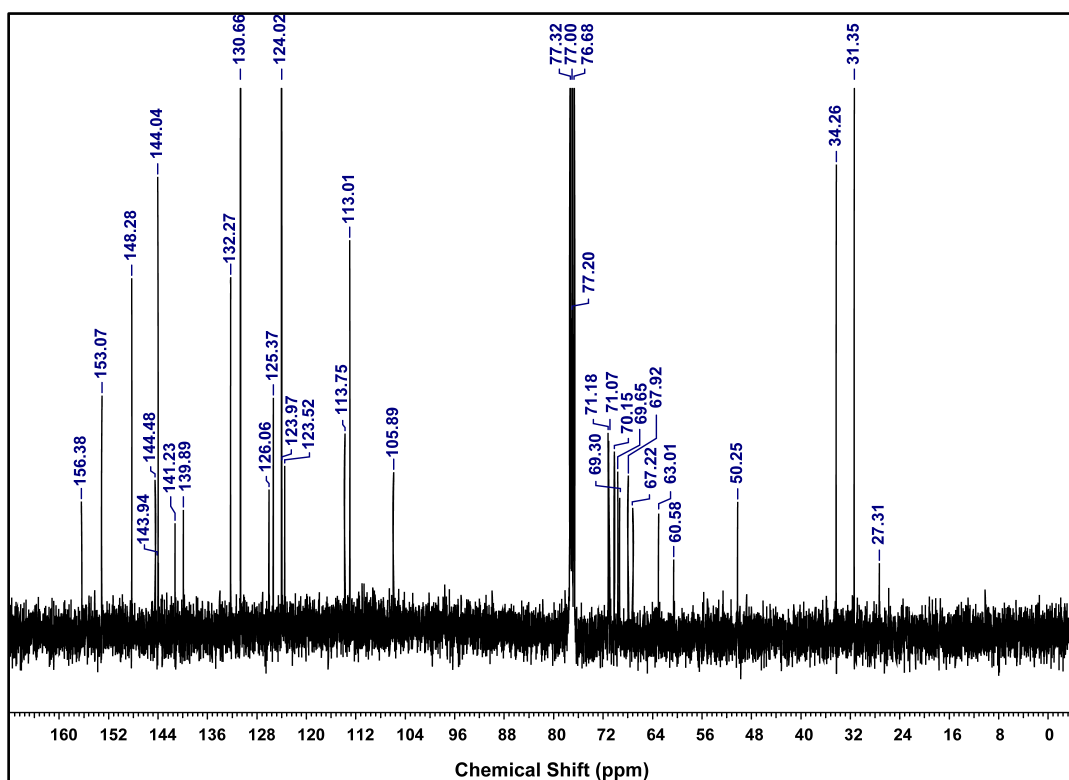

Figure S16. 100 MHz <sup>13</sup>C NMR spectrum of spectrum of BIPY.2PF<sub>6</sub> rotaxane 11

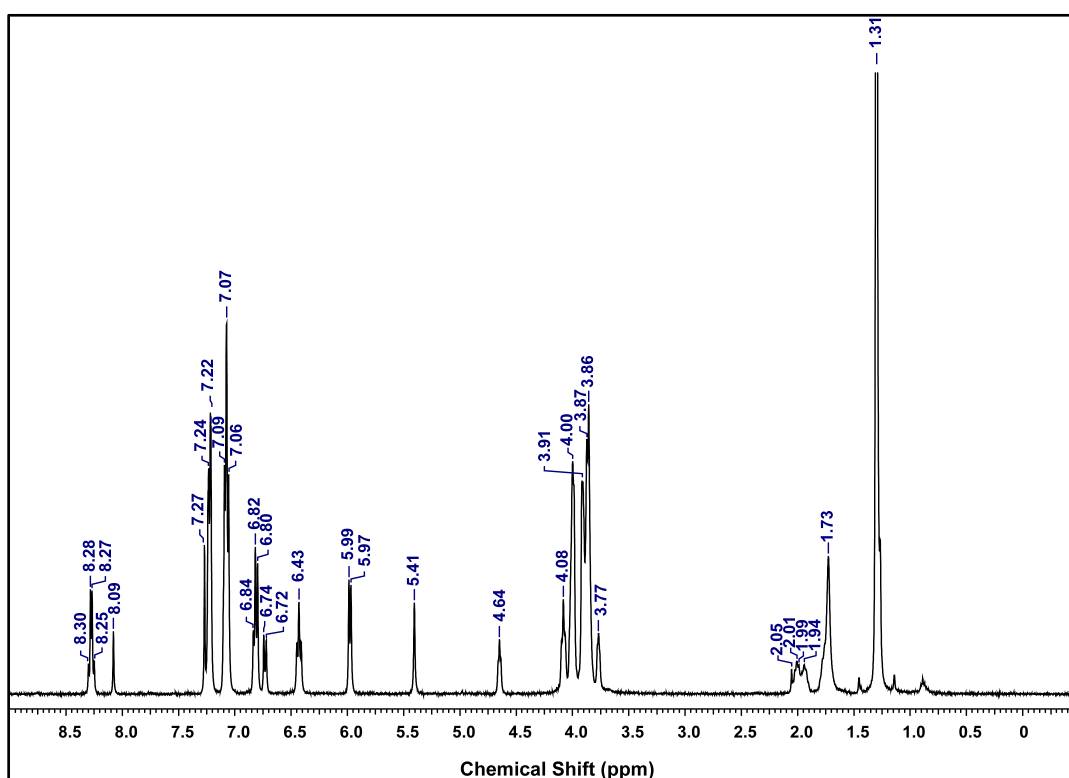

Figure S17. 400 MHz <sup>1</sup>H NMR spectrum of NDI rotaxane 12

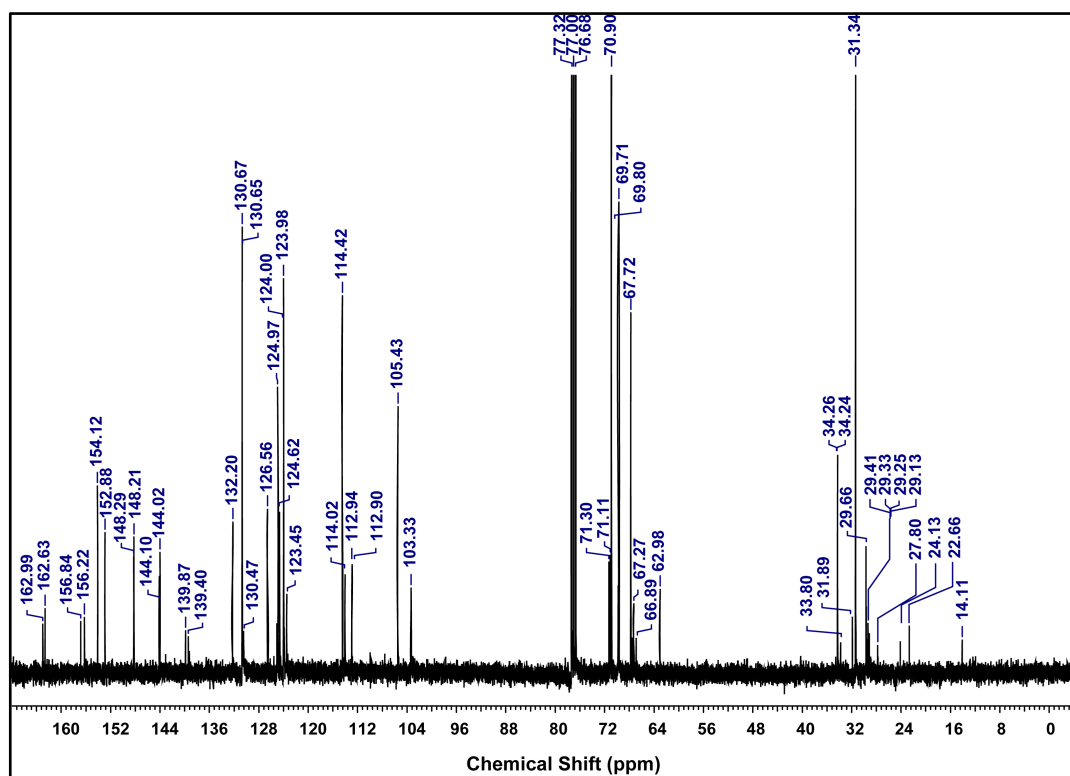

Figure S18. 100 MHz <sup>13</sup>C NMR spectrum of spectrum of NDI rotaxane 12
